# Supplementary material
Source: Copernicus journal article supplement (doi:10.5194/cp-22-1085-2026)
Supplement: Supplementary file 1 [file cp-22-1085-2026-supplement.pdf]

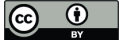

*Supplement of*

## **Glacial-interglacial shifts in dominant climate forcing over the last 33 ka in the northern South China Sea**

**Xueqin Zhao et al.**

*Correspondence to:* Xueqin Zhao (xqzhao@shou.edu.cn)

The copyright of individual parts of the supplement might differ from the article licence.

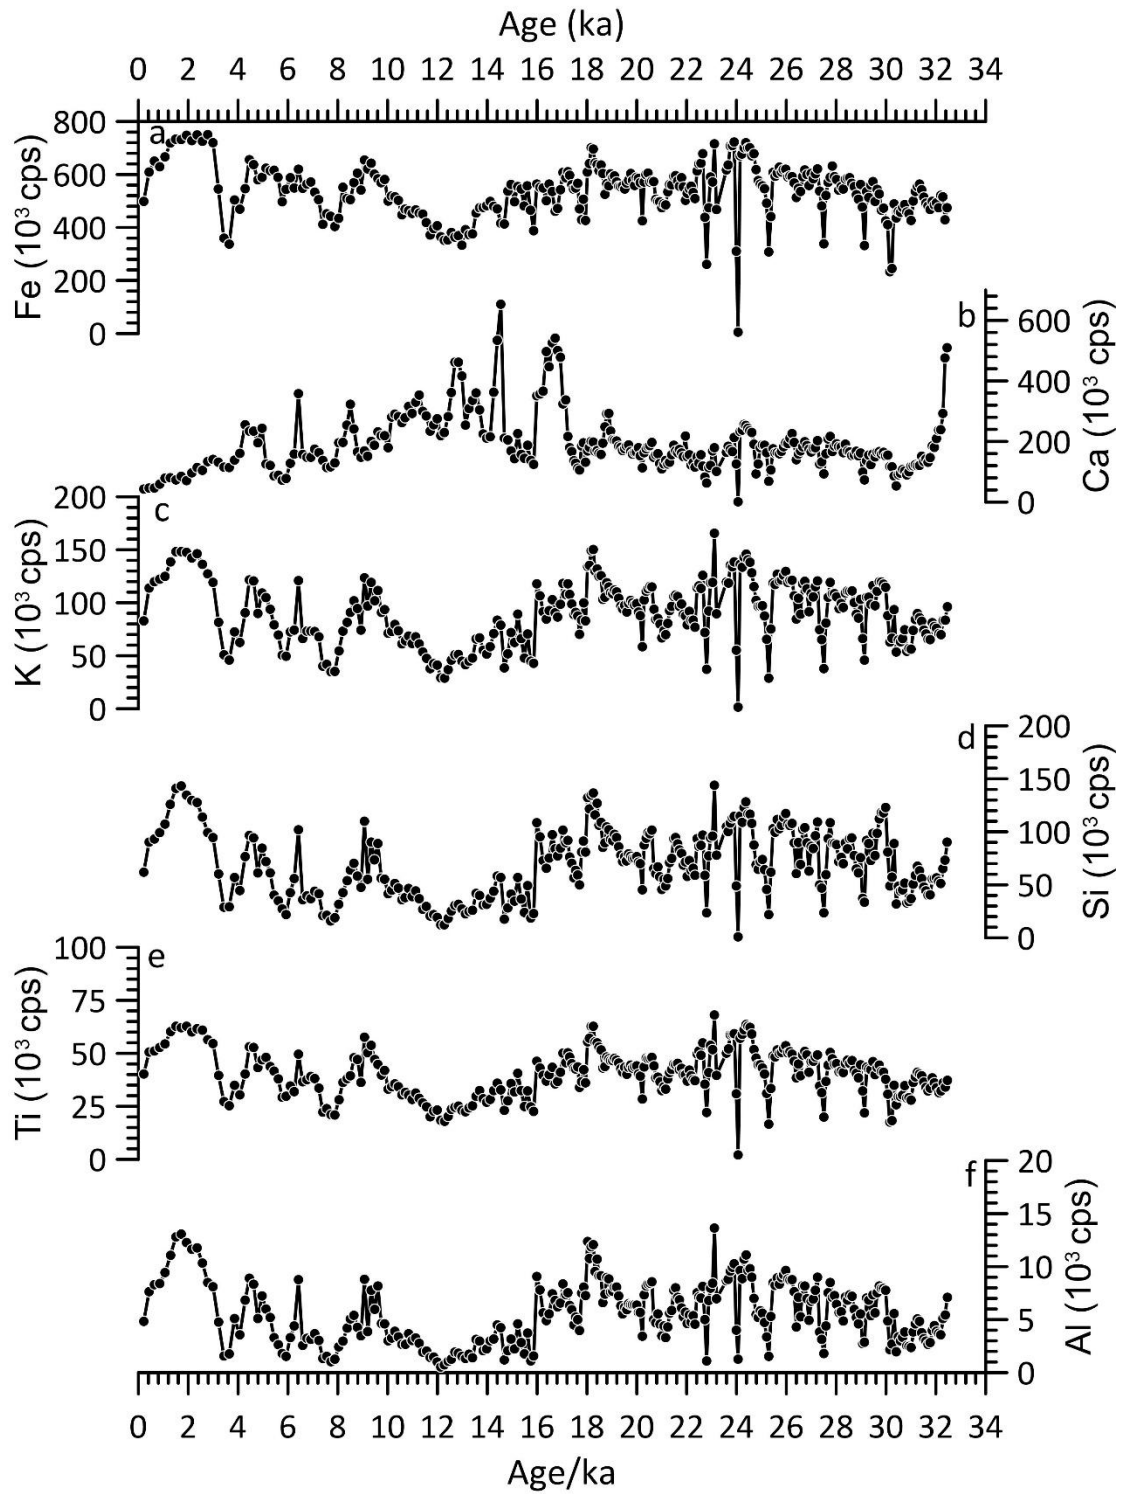

**Figure S1.** The relative contents of six elements in the core SCS GC-1.

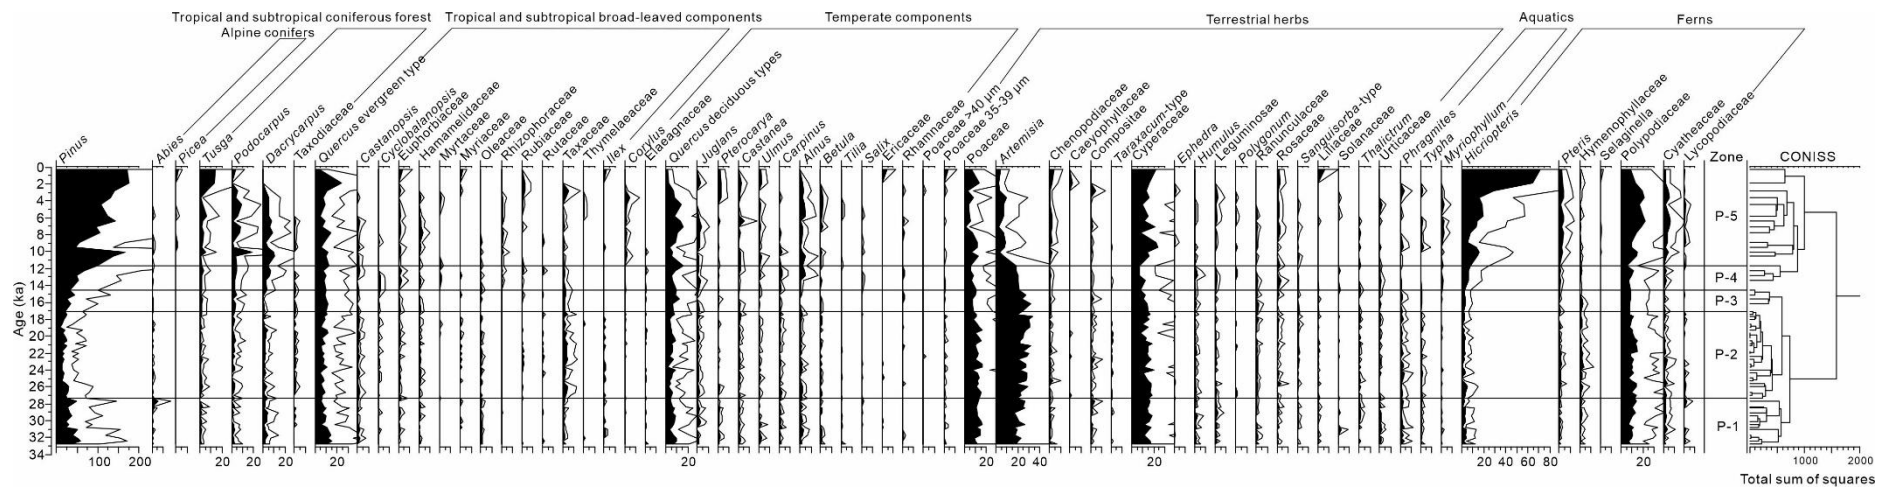

**Figure S2.** Percentages of pollen taxa observed in the core SCS GC-1. Lines denote three times exaggeration of percentage curves with low values. Pollen assemblage zones were conducted using the CONISS calculation.

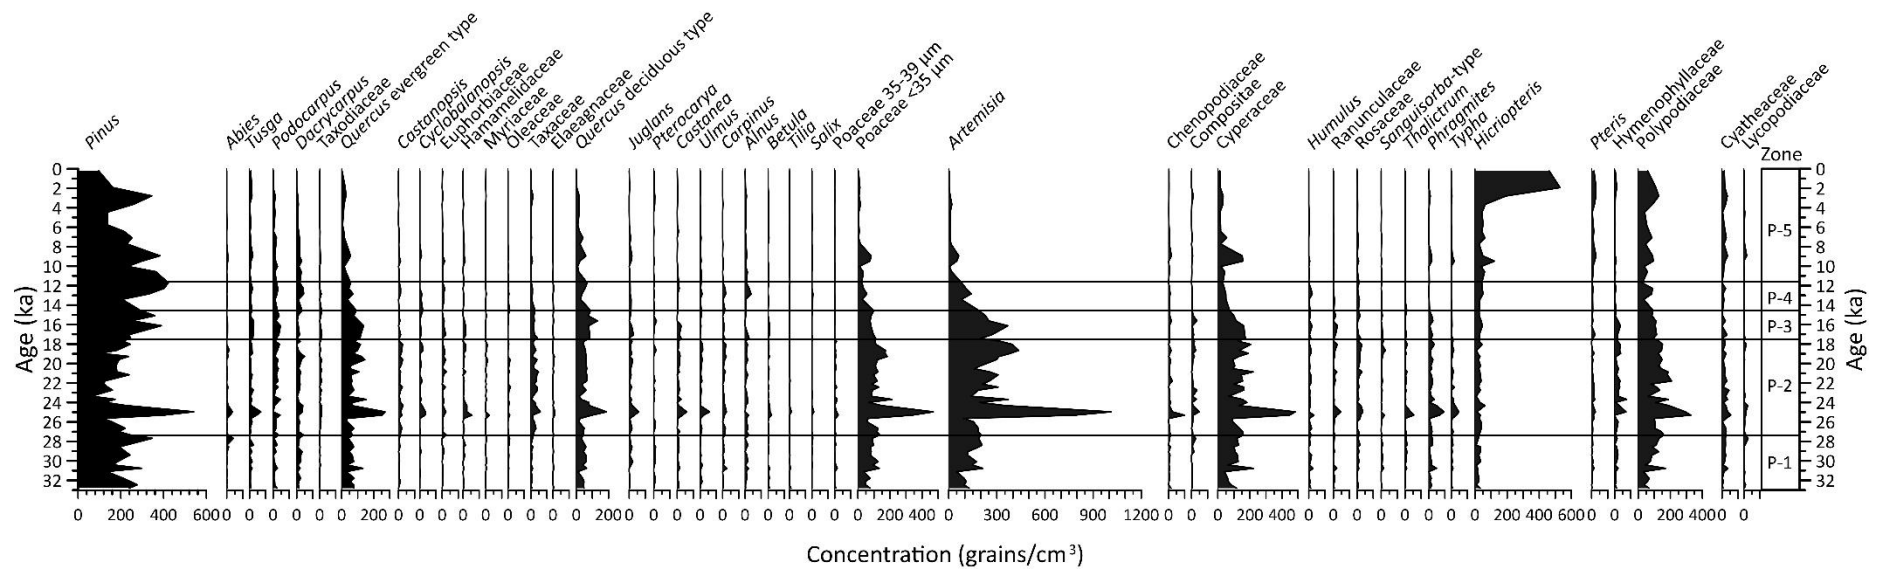

**Figure S3.** Concentrations of pollen taxa (with values more than 10 grains/cm<sup>3</sup> were shown) observed in the core SCS GC-1.

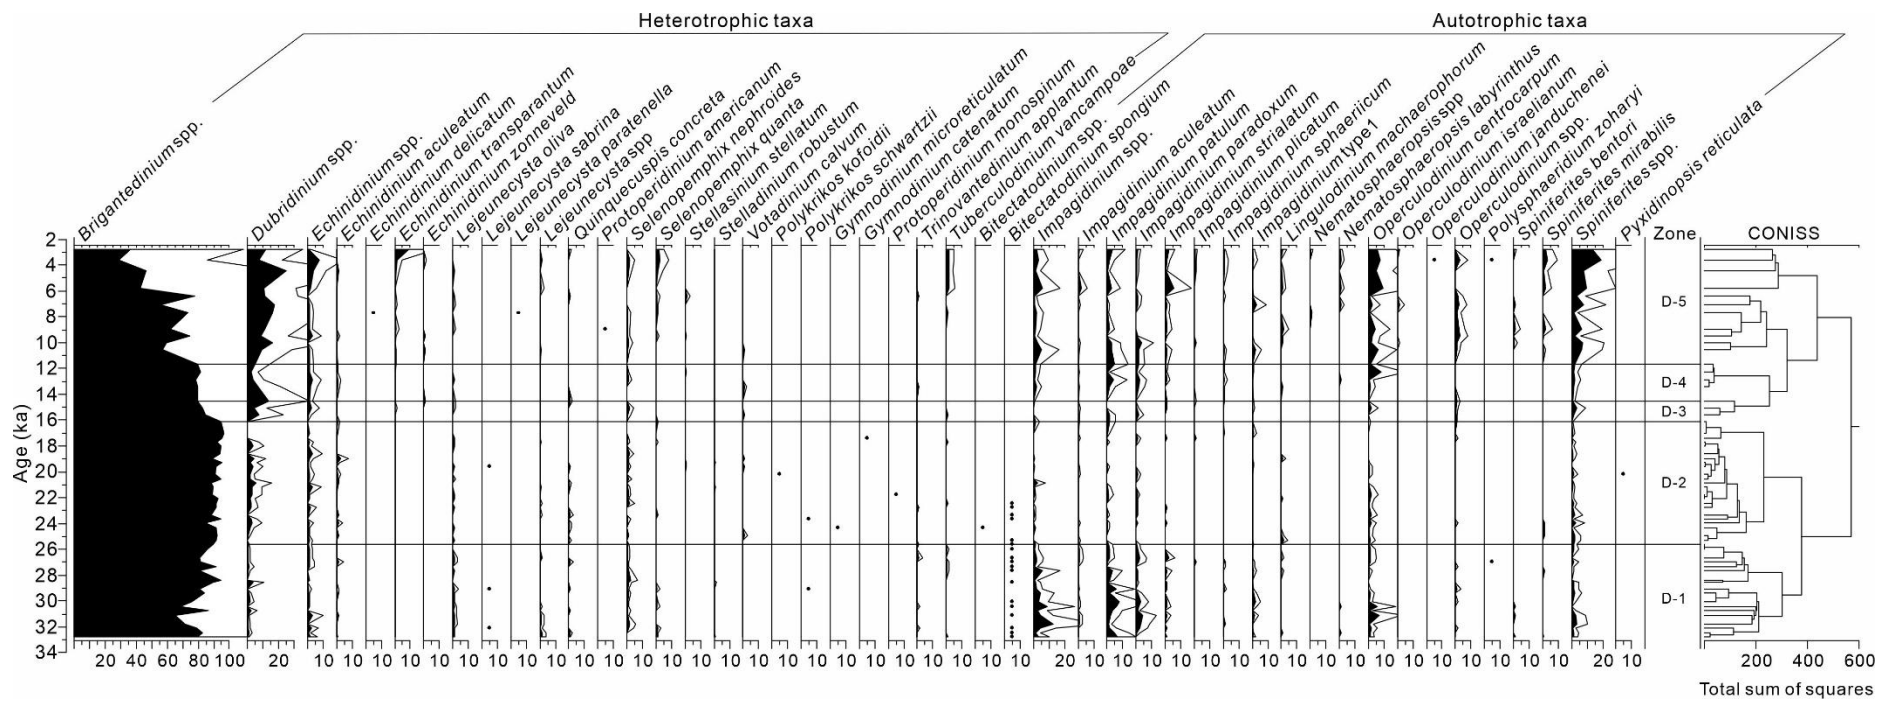

**Figure S4.** Percentages of dinocyst taxa in the core SCS GC-1. Lines denote three times exaggeration of percentage curves with low values, and the dots denote presence of taxa with percentage values less than 1%. Dinocyst assemblage zones were conducted using the CONISS calculation.

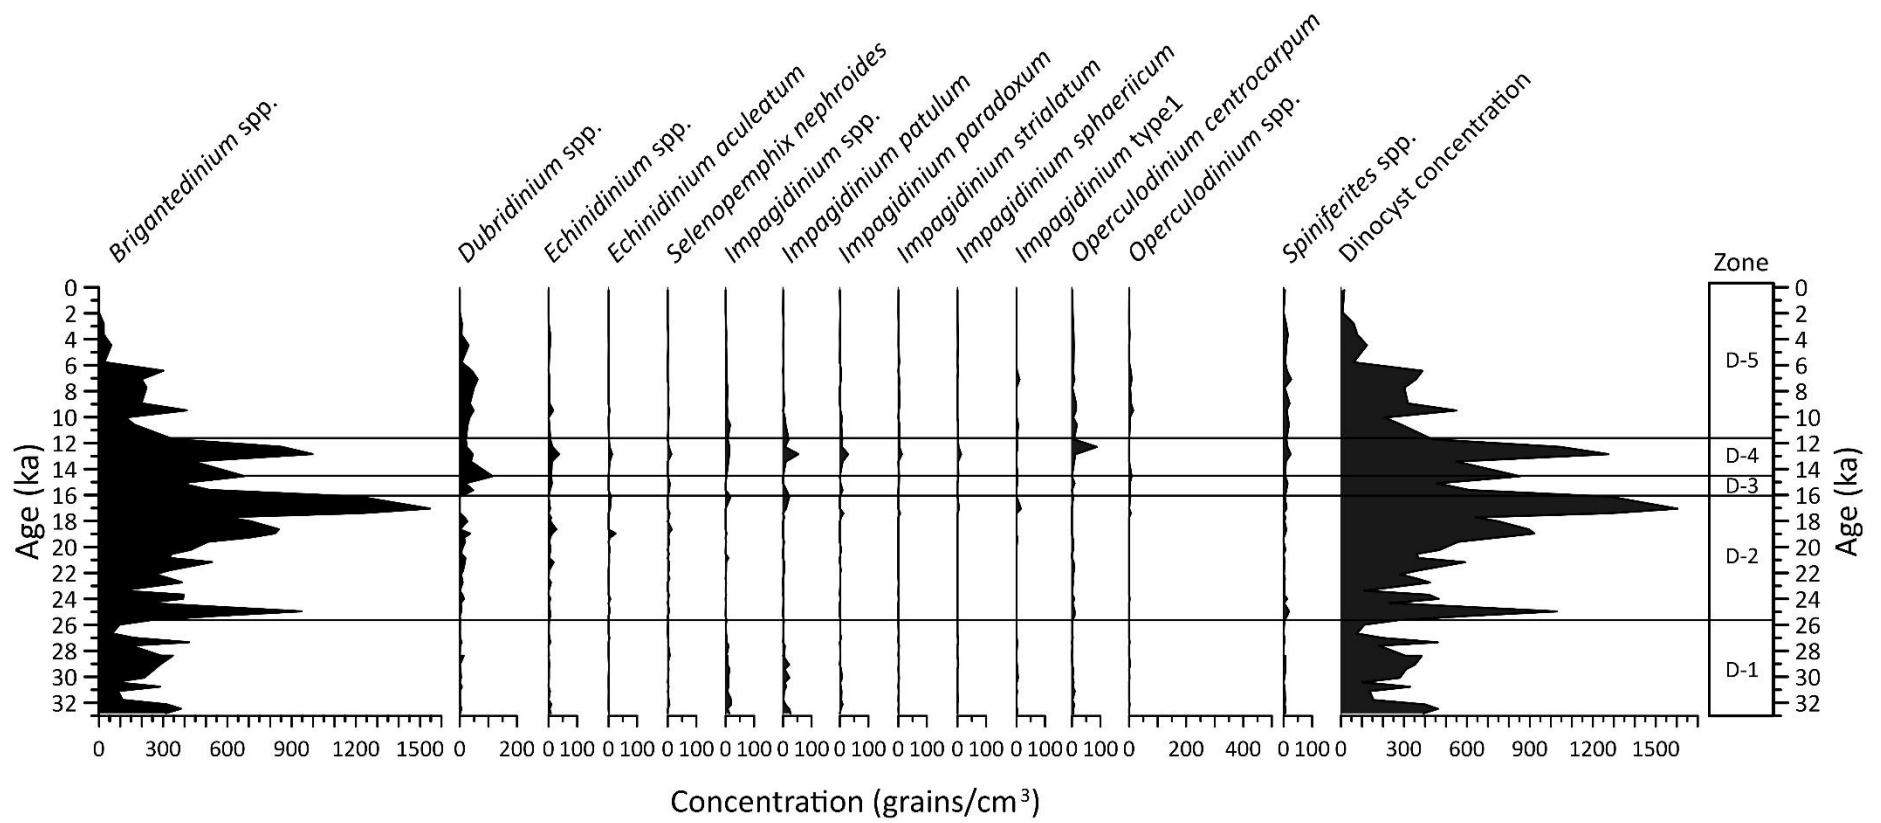

**Figure S5.** Concentrations of dinocyst taxa (with values more than 10 grains/cm<sup>3</sup> were shown) observed in the core SCS GC-1.

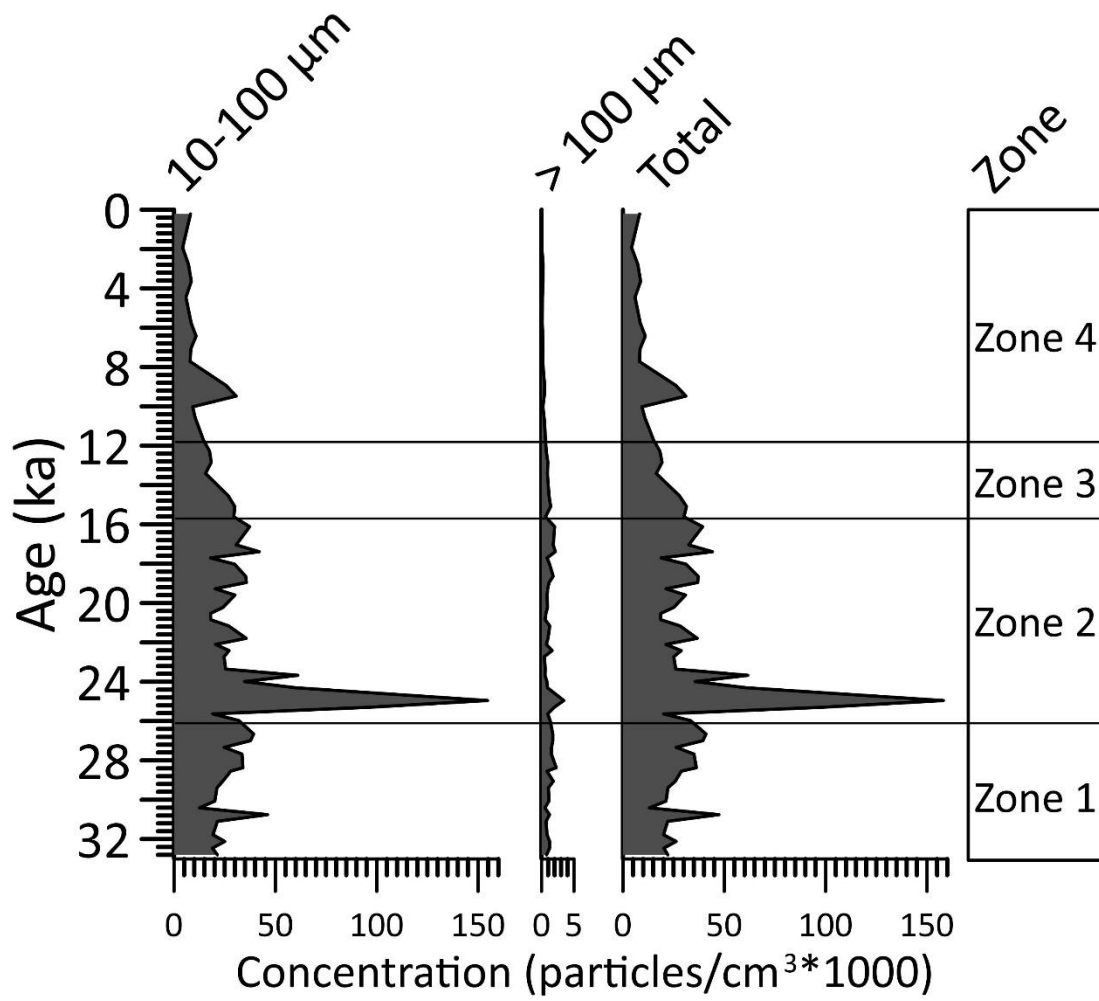

**Figure S6.** Microcharcoal concentrations with two size classes (10-100 μm and >100 μm) in the core SCS GC-1.

**Table S1. List of organic-walled dinoflagellate cyst taxa identified in the core SCS GC-1.**

| <b>Cyst name</b>                   | <b>Motile affinity</b>            | <b>Palaeoecological interpretation</b>                                                                                | <b>References</b>                                                       |
|------------------------------------|-----------------------------------|-----------------------------------------------------------------------------------------------------------------------|-------------------------------------------------------------------------|
| <b>Protoperidiniaceae</b>          |                                   |                                                                                                                       |                                                                         |
| <i>Brigantedinium</i> spp.         | <i>Protoperidinium</i> spp.       | Related to upwelling or nutrient                                                                                      | Zonneveld and Pospelova, 2015; Marret and Zonneveld, 2003               |
| <i>Dubridinium</i> spp.            |                                   | Related to upwelling or nutrient                                                                                      | Zonneveld and Pospelova, 2015; Bouimetarhan et al. 2009                 |
| <i>Echinidinium aculeatum</i>      | <i>Protoperidiniaceae</i>         | Coastal areas with active upwelling; areas of increased nutrient and low salinity                                     | Zonneveld and Pospelova, 2015; Pospelova and Kim, 2010                  |
| <i>Echinidinium</i> spp.           | <i>Protoperidiniaceae</i>         | Mesotrophic/eutrophic waters; upwelling                                                                               | Zonneveld and Pospelova, 2015; Marret and Zonneveld, 2003               |
| <i>Echinidinium delicatum</i>      | <i>Protoperidiniaceae</i>         | highest occurrence in the subtropics and tropics; coastal upwelling                                                   | Zonneveld and Pospelova, 2015; Verleye and Louwye, 2010                 |
| <i>Echinidinium transparantum</i>  | <i>Protoperidiniaceae</i>         | subtropical-tropical; relatively low SST and high SSS; upwelling; high productivity                                   | Zonneveld and Pospelova, 2015; Kholeif, 2010; Bouimetarhan et al., 2009 |
| <i>Echinidinium zonneveldii</i>    | <i>Protoperidiniaceae</i>         | Relatively low SST and high SSS; upwelling; high productivity                                                         | Zonneveld and Pospelova, 2015; Bouimetarhan et al., 2009                |
| <i>Lejeunecysta</i> spp.           |                                   | Shallow waters with high levels of productivity and nutrient content; freshwater inflows in estuarine environments    | Zonneveld and Pospelova, 2015; Sluijs et al., 2005                      |
| <i>Lejeunecysta oliva</i>          | <i>Protoperidinium</i> sp.        | River outflow; warm, nutrient-rich, low-salinity waters                                                               | Zonneveld and Pospelova, 2015; Vink et al., 2000                        |
| <i>Lejeunecysta sabrina</i>        | ? <i>Protoperidinium leonis</i>   | Temperate to tropical coastal areas                                                                                   | Zonneveld et al., 2013; Nieuwenhove et al., 2020                        |
| <i>Lejeunecysta paratenella</i>    | ? <i>Protoperidinium</i> sp.      | Cool, nutrient-rich waters; likely related to upwelling                                                               | Zonneveld and Pospelova, 2015; Zhao et al., 2017                        |
| <i>Quinquecuspis concreta</i>      | ? <i>Protoperidinium leonis</i>   | Inner-outer shallow sea, cold temperate to tropical zone; full of nutrition; river impact                             | Zonneveld and Pospelova, 2015; Nieuwenhove et al., 2020                 |
| <i>Selenopemphix quanta</i>        | <i>Protoperidinium conicum</i>    | Highest abundances in subtropical and tropical; nutrient-rich waters                                                  | Zonneveld and Pospelova, 2015; Zonneveld et al., 2013                   |
| <i>Selenopemphix nephroides</i>    | <i>Protoperidinium subinerme</i>  | Warm and productive shallow waters; upwelling                                                                         | Zonneveld and Pospelova, 2015; Ramírez-Valencia et al., 2021            |
| <i>Selenopemphix stellatum</i>     |                                   | Adapted to variable salinity, meso-eutrophic, and oxygenated waters                                                   | Zonneveld and Pospelova, 2015                                           |
| <i>Stelladinium robustum</i>       | <i>Protoperidinium</i> sp.        | Tropical to equatorial, mesotrophic to eutrophic environments; Increased mixing and cooling of the upper water column | Zonneveld and Pospelova, 2015; Zonneveld et al., 2013                   |
| <i>Trinovantedinium applanatum</i> | <i>Protoperidinium pentagonum</i> | River outflow; warm, nutrient-rich, low-salinity waters                                                               | Zonneveld and Pospelova, 2015; Vink et al., 2000                        |
| <i>Votadinium calvum</i>           | <i>Protoperidinium oblongum</i>   | Subpolar/temperate-equator; inner shallow sea/nearshore estuarine environment                                         | Zonneveld and Pospelova, 2015; Marret and Zonneveld, 2003               |
| <i>Protoperidinium americanum</i>  | <i>Protoperidinium americanum</i> | High productivity and nutritional levels; coastal upwelling                                                           | Zonneveld and Pospelova, 2015; Pospelova et al., 2008                   |
| <i>Protoperidinium monospinum</i>  | <i>Protoperidinium monospinum</i> | High nutrient in tropical-equatorial river outflow and upwelling areas                                                | Zonneveld and Pospelova, 2015; Zonneveld et al., 2013                   |
| <i>Pyxidinoopsis reticulata</i>    |                                   | Eurythermal; High-salinity tolerant                                                                                   | Zonneveld et al., 2013                                                  |
| <b>Polykrikaceae</b>               |                                   |                                                                                                                       |                                                                         |
| <i>Polykrikos kofoidii</i>         | <i>Polykrikos kofoidii</i>        | Nutrient-rich upwelling conditions in temperate to subtropical regions; inner shallow sea                             | Zonneveld and Pospelova, 2015; Marret and Zonneveld, 2003               |

|                                      |                                     |                                                                                                                                                                                                                                |                                                              |
|--------------------------------------|-------------------------------------|--------------------------------------------------------------------------------------------------------------------------------------------------------------------------------------------------------------------------------|--------------------------------------------------------------|
| <i>Polykrikos schwartzii</i>         | <i>Polykrikos schwartzii</i>        | Nutrient-rich upwelling conditions in temperate to subtropical regions                                                                                                                                                         | Zonneveld and Pospelova, 2015; Marret and Zonneveld, 2003    |
| <b>Gymnodiniaceae</b>                |                                     |                                                                                                                                                                                                                                |                                                              |
| <i>Gymnodinium microreticulatum</i>  | <i>Gymnodinium microreticulatum</i> | Coastal areas in temperate to subtropical, oligotrophic to mesotrophic regions                                                                                                                                                 | Zonneveld and Pospelova, 2015; Zonneveld et al., 2013        |
| <i>Gymnodinium catenatum</i>         | <i>Gymnodinium catenatum</i>        | It inhabits tropical/subtropical high-productivity marine areas, has a low tolerance for temperature/salinity fluctuations, and its survival strictly depends on nutrient-rich waters brought by upwelling or vertical mixing. | Zonneveld et al., 2013                                       |
| <b>Gonyaulaceae</b>                  |                                     |                                                                                                                                                                                                                                |                                                              |
| <i>Bitectatodinium spongium</i>      |                                     | Prefers warm and saline environments; fully marine environments                                                                                                                                                                | Zonneveld et al., 2013                                       |
| <i>Impagidinium</i> spp.             | <i>Gonyaulax</i> sp.                | Oligotrophic marine; sea level rise                                                                                                                                                                                            | Zonneveld and Pospelova, 2015; Powell et al., 1996           |
| <i>Impagidinium aculeatum</i>        | <i>Gonyaulax</i> sp.                | Relatively warm, high-salinity, oligotrophic open-ocean environments                                                                                                                                                           | Zonneveld et al., 2013                                       |
| <i>Impagidinium paradoxum</i>        | <i>Gonyaulax</i> sp.                | A species with broad temperature tolerance, high-salinity marine habitat preference, and optimal growth in oligotrophic waters                                                                                                 | Zonneveld et al., 2013                                       |
| <i>Impagidinium patulum</i>          | <i>Gonyaulax</i> sp.                | Warm, high-salinity, oligotrophic open-ocean preference                                                                                                                                                                        | Zonneveld et al., 2013                                       |
| <i>Impagidinium plicatum</i>         | <i>Gonyaulax</i> sp.                | There existed warm, normal-salinity, nutrient-depleted oligotrophic sea areas                                                                                                                                                  | Zonneveld et al., 2013                                       |
| <i>Impagidinium sphaericum</i>       | <i>Gonyaulax</i> sp.                | A species widely distributed in the open ocean, characterized as eurythermal and eurytrophic, with a preference for eutrophic marine environments                                                                              | Zonneveld et al., 2013                                       |
| <i>Impagidinium striolatum</i>       | <i>Gonyaulax</i> sp.                | An oligotrophic species distributed in the low- to mid-latitude open ocean, adapted to temperate and tropical climates                                                                                                         | Zonneveld et al., 2013                                       |
| <i>Lingulodinium machaerophorum</i>  | <i>Lingulodinium polyedrum</i>      | Inner shallow sea; tropical-subtropical; high productivity                                                                                                                                                                     | Zonneveld and Pospelova, 2015; Marret and Zonneveld, 2003    |
| <i>Nematosphaeropsis labyrinthus</i> | <i>Gonyaulax spinifera</i>          | Tropical and subtropical; oligotrophic marine; sea level rise                                                                                                                                                                  | Zonneveld and Pospelova, 2015; Wall et al., 1977             |
| <i>Operculodinium</i> spp.           |                                     | Open ocean; cosmopolitan species                                                                                                                                                                                               | Zonneveld and Pospelova, 2015; Wall et al., 1977             |
| <i>Operculodinium centrocarpum</i>   | <i>Protoceratium reticulatum</i>    | Cosmopolitan species; intersection of oceanic and shallow water masses, cold/temperate zones, higher nutrients                                                                                                                 | Zonneveld and Pospelova, 2015; Zonneveld et al., 2013        |
| <i>Operculodinium janduchenei</i>    |                                     | Temperate-equatorial; oligotrophic to eutrophic environment                                                                                                                                                                    | Zonneveld and Pospelova, 2015; Zonneveld et al., 2013        |
| <i>Operculodinium israelianum</i>    | ? <i>Protoceratium</i> sp.          |                                                                                                                                                                                                                                | Zonneveld et al., 2013                                       |
| <i>Polysphaeridium zoharyi</i>       | <i>Pyrodinium bahamense</i>         | Subtropical inner shallow sea; declined abundance with rising sea levels; typical lagoon and shallow water species                                                                                                             | Zonneveld and Pospelova, 2015; Wall et al., 1977             |
| <i>Spiniferites bentori</i>          | <i>Gonyaulax</i> sp.                | Warm conditions                                                                                                                                                                                                                | Zonneveld and Pospelova, 2015                                |
| <i>Spiniferites mirabilis</i>        | <i>Gonyaulax spinifera</i> complex  | Warm conditions; shallow to ocean area                                                                                                                                                                                         | Zonneveld and Pospelova, 2015; Marret and Zonneveld, 2003    |
| <i>Spiniferites</i> spp.             | <i>Gonyaulax</i> spp.               | Outer shallow sea; high SST, weak upwelling and fully oceanic conditions                                                                                                                                                       | Zonneveld and Pospelova, 2015; Zonneveld et al., 2013        |
| <i>Tuberculodinium vancampoae</i>    | <i>Pyrophacus steinii</i>           | Tropical to subtropical; inner shallow seas and lagoons                                                                                                                                                                        | Zonneveld and Pospelova, 2015; Versteegh and Zonneveld, 1994 |

# SST: sea surface temperature; SSS: sea surface salinity.
